# Supplementary material for: Polyethylene Degradation by a Rhodococcous Strain Isolated from Naturally Weathered Plastic Waste Enrichment
Source: PubMed Central journal article supplement — Environ Sci Technol. 2023 Sep 8;57(37):13901–11. doi: 10.1021/acs.est.3c03778 (PMC10515485; doi:10.1021/acs.est.3c03778), 2023-09-08
Supplement: es3c03778_si_001.pdf [file es3c03778_si_001.pdf]

1 **Supporting information for “Polyethylene degradation by a *Rhodococcus* strain isolated**  
2 **from naturally weathered plastic waste enrichment”**

3  
4 Xuanyu Tao<sup>1,#</sup>, Huanrong Ouyang<sup>2,#</sup>, Aifen Zhou<sup>1,#,\*</sup>, Dongyu Wang<sup>3</sup>, Hagan Matlock<sup>1</sup>, Josiah S.  
5 Morgan<sup>1</sup>, Abigail T. Ren<sup>1</sup>, Dashuai Mu<sup>4</sup>, Chongle Pan<sup>3</sup>, Xuejun Zhu<sup>2</sup>, Arum Han<sup>5,6,7</sup>, and Jizhong  
6 Zhou<sup>1,\*</sup>

7 <sup>1</sup>Institute for Environmental Genomics, Department of Microbiology and Plant Biology,  
8 University of Oklahoma, Norman, OK 73019, USA

9 <sup>2</sup>Department of Chemical Engineering, Texas A&M University, College station, TX 77843, USA

10 <sup>3</sup>Department of Microbiology and Plant Biology, University of Oklahoma, Norman, OK 73019,  
11 USA

12 <sup>4</sup>Marine College, Shandong University, Weihai 264105, China

13 <sup>5</sup>Department of Electrical and Computer Engineering, Texas A&M University, College station,  
14 TX 77843, USA

15 <sup>6</sup>Department of Biomedical Engineering, Texas A&M University, College station, TX 77843,  
16 USA

17 <sup>7</sup>Department of Chemical Engineering, Texas A&M University, College station, TX 77843, USA

18 # These authors contributed equally to this work.

19 \*Corresponding author: Aifen Zhou, Aifen.Zhou-1@ou.edu; Jizhong Zhou, jzhou@ou.edu

20

21

22

**Number of pages:16**

23

**7 Texts and 7 Figure**

24 **Supplementary Texts**

25 **Materials and Methods**

26 **Text S1. Establishment of enrichment cultures, bacterial strain isolation, morphological and**  
27 **physiological characterization.** Naturally weathered plastic waste was harvested from a lakeside  
28 environment in Norman, OK. The plastic was cut into pieces (about 0.5 inch × 1 inch) using a  
29 sterile scissor and incubated in 100 ml carbon-free basal medium (CFBM) in 300 ml flasks to  
30 enrich plastic degrading microorganisms. The enrichment cultures were kept at 30°C with shaking  
31 (100 rpm). After 12 transfers of the enrichment cultures, a few small pieces of plastics with visually  
32 observable biofilms were transferred into disposable culture tubes with 5 ml CFBM + 0.01% yeast  
33 extract to promote microbial growth. After 35 days of incubation, the culture was vortexed and  
34 diluted (1 to 100) with CFBM and plated (50 µl per plate) onto ½ LB plates for bacteria strain  
35 isolation. Single colonies were streaked two rounds on ½ LB plates to get pure cultures. Overnight  
36 cell cultures were used for Gram staining following standard protocol. Cell morphology was  
37 observed using scanning electron microscope (SEM). Fresh overnight cell cultures were fixed  
38 using 4% glutaraldehyde in 0.1 M phosphate buffer (pH 7.4) for overnight at 4°C. After fixation,  
39 the samples were washed three times using 0.1 M phosphate buffer for 10 min each followed by  
40 three washes with distilled water for 10 min each. Dehydration with ethanol was achieved by 10  
41 min each at 25%, 50%, 70%, 85%, and 95% concentration. The final dehydration with 100%  
42 ethanol was conducted three times with 10 min each. The dehydrated cell samples were critical  
43 point-dried and metal coated for SEM imaging. Removal of buffer or supernatant in all steps was  
44 achieved by centrifuging the samples at 5,000 rpm for 5 min.

45 **Text S2. Lipase activity assay.** The qualitative lipase activity assay was conducted by using agar  
46 plates supplemented with olive oil as a source of long-chain fatty acids and Rhodamine B as a

47 fluorescence dye binding to the cleaved fatty acids. The agar plates containing nutrient broth (8  
48 g/liter), sodium chloride (4 g/liter), and agar (10 g/liter) were prepared. Olive oil (31.25 ml) and  
49 Rhodamine B (10 ml of 1 mg/ml stock) were then added into one-liter hot medium (about 60°C)  
50 and stirred vigorously before pouring into plates. Bore holes (~6 mm diameter) on solidified plates  
51 were made using the wide end of the sterile pipette. 30 µl cell cultures were added into each bore  
52 hole and the plates were incubated at 30°C for 48 hours. The lipase activity was examined by  
53 irradiating the plates with UV light at 350 nm using the Azure Biosystems 400 imaging system  
54 (Dublin, CA, USA).

55

56 **Text S3. 16S rRNA gene amplicon sequencing and whole genome sequencing.** Genomic DNA  
57 was isolated from enrichment culture or pure cell culture using GenElute™ Bacterial Genomic  
58 DNA Kits (Sigma, Cat # NA2110) and 16S rRNA was amplified by using primers 27F and 1492R  
59 following the standard protocol<sup>1</sup>. Sanger sequencing of the purified PCR fragments were  
60 performed at Oklahoma Medical Research Facility (OMRF, Oklahoma City, OK, USA). For the  
61 whole genome sequencing, 1 µg genomic DNA was used for construction of the sequencing  
62 libraries with KAPA Hyper Prep Kit (KR0961-v2.15, Kapabiosystems). DNA was fragmented (~  
63 300 bp) with a Covaris M220 focused-ultrasonicator (Covaris, Woburn, MA) and applied to  
64 ligation, amplification, and purification following the standard protocol. The sequencing was  
65 conducted with Hiseq3000 PE150 platform at OMRF. Sequence adaptors and reads with low-  
66 quality scores were removed using “BBduk” in the BBTools package<sup>2</sup>. Next, error correction and  
67 normalization of the remaining reads were performed using “BBnorm” in the BBTools package.  
68 Finally, the high-quality reads were assembled into contigs using SPAdes v.3.15.2 and the contigs  
69 were annotated using the PATRIC platform<sup>3</sup>.

70

71 **Text S4. PE powder degradation test.** PE powder (Sigma-Aldrich, Cat:427772-250G, 0.5 g)  
72 were weighed using a fine scale and transferred to a 50 ml centrifuge tube. 20 ml 70% ethanol was  
73 added into the tube and rotated for 30 min at room temperature. Sterilized PE powder was collected  
74 by centrifuging the tubes at 12,000×g for 30 min with slow acceleration and deceleration. After  
75 removal of the supernatant, PE powder was air-dried overnight under a biosafety hood. Three  
76 groups including C1 to C4 for PE powder only, C5-C8 for bacteria only, and T1-T4 for bacteria  
77 and PE powder were set up and incubated for 30 days at 30°C with shaking (200 rpm).

78

79 **Text S5. Characterization of PE physical and chemical changes and potential degradation**  
80 **products.**

81 After 30 days of incubation, PE powder was harvested using a 0.22 µm filter unit (150 ml) (VWR,  
82 Cat #10040-460) and the flow through was collected for GC-MS analysis of the potential  
83 degradation products. PE powder on the membrane was washed off multiple times using 2% SDS  
84 and collected in 50 ml centrifuge tube to a final volume of about 30 ml per tube. The tubes were  
85 rotated (80 rpm) overnight at room temperature. The washed powder was collected using a  
86 filtration unit (VWR, Cat #10040-460, 0.45µm) and air dried for overnight under a biosafety hood.  
87 Dried PE powder was mounted to SEM tubes followed by metal coating for SEM imaging (Samuel  
88 Roberts Noble Microscopy Laboratory, University of Oklahoma), or used for HT-GPC analysis  
89 (10 mg per sample, the Soft Matter Facility at Texas A&M University) to determine the molecular  
90 weight and FTIR (IRPrestige-21, Shimadzu) analysis to determine the functional group changes.  
91 FTIR measurements were performed using smartsingle-bounce ATR with a diamond tip in the  
92 4000-400 cm<sup>-1</sup> range. The IR spectrum table & chart from Sigma-Aldrich was used as reference

93 for peak alignments (<https://www.sigmaaldrich.com/US/en/technical-documents/technical->  
94 [article/analytical-chemistry/photometry-and-reflectometry/ir-spectrum-table](https://www.sigmaaldrich.com/US/en/technical-documents/technical-article/analytical-chemistry/photometry-and-reflectometry/ir-spectrum-table)). For GC-MS  
95 analysis of the supernatant, 3 ml of each supernatant sample was extracted with 1v/v of  
96 dichloromethane. The organic layer was separated and concentrated into 500 µl of  
97 dichloromethane. 1µl of each sample was used for GC-MS analysis on Ultra GC/DSQ  
98 (ThermoElectron; Waltham, MA). DB-5MS was used as a gas chromatographic column with  
99 dimensions of 30 m length, 0.25 mm i.d., and 0.25 µm film thickness (Agilent Technologies; Santa  
100 Clara, CA). Helium (>99.999%) was used as a carrier gas at constant flow of 1.2 ml/min through  
101 the column. The inlet temperature was held at 225°C and was used in splitless mode. The column  
102 temperature was maintained at 50°C for 3 min and raised to 300°C at a rate of 6°C/min, and then  
103 held for 3 min. Transfer line and ion source were held at 250°C. Electron impact at 70eV was used  
104 for ionization.

105

106 **Text S6. Time series proteomics analysis of A34 using PE powder as the sole carbon source.**

107 The A34 strain was revived in small volume TSB (4 ml per tube) by incubating at 30°C overnight.  
108 The cell cultures were inoculated into bigger volume TSB (100 ml) and grew to late log-phase.  
109 Collect time zero cell samples for preparation of intracellular protein samples grown in TSB by  
110 centrifuging at 8,000g for 10 min at 4°C. Supernatant were obtained by filtering the cell culture  
111 using 0.2 µm filter unit and concentrated using Vivaspin® 5 kDa MWCO Concentrator (Sigma-  
112 Aldrich, catalogue #: Z614009). After that, cell cultures were washed with CFBM twice and  
113 resuspended in CFBM (1 to 10 dilution), and time zero sample was collected for the time-series  
114 proteomics. Four replicates test flasks were prepared with 100 ml cell culture and 0.5 g PE powder  
115 per flask. The cell cultures were incubated at 30°C with shaking (200 rpm). Samples were collected

116 at 3, 6, 12, 24, or 48 hours. Supernatant samples were collected at 48 hours and concentrated as  
117 described above. All samples were kept at -80°C before protein extraction. Protein extraction,  
118 proteomics sample preparation and digestion were conducted following our previous protocol<sup>4</sup>  
119 with minor modifications. Briefly, cell pellets were re-suspended in lysis buffer (50 mM Tris-HCl  
120 pH 8.0, 2% SDS, and 0.1 M dithiothreitol) followed by disruption using a bead-beating method  
121 (MP Biomedicals, Irvine, CA). The supernatant was collected by centrifugation at 15,000 × g for  
122 10 min at 4°C. Proteins were precipitated overnight using trichloroacetic acid (25% v/v) at 4°C  
123 and collected by centrifugation at 20,800 × g for 20 min at 4°C. The protein pellets were washed  
124 three times with ice-cold acetone and resuspended in guanidine buffer (6 M Guanidine HCl, 10  
125 mM DTT in Tris CaCl<sub>2</sub> buffer (50 mM Tris, 10 mM CaCl<sub>2</sub>, pH 7.6)). Protein concentrations were  
126 quantified using the Thermo Scientific™ Pierce™ BCA Protein Assay Kit (Thermo Fisher  
127 Scientific, Waltham, MA). To prepare samples for proteomics assay, 20 mg protein was processed  
128 using the filter-aided sample preparation method<sup>4</sup> and digested with a trypsin-LysC mixture  
129 (Promega, Madison, WI ). The resulting peptide samples were purified using Pierce C18 Spin  
130 Columns (Thermo Fisher Scientific, Waltham, MA) and eluted in 20 µl elution buffer.

131 Tryptic peptides were separated by reverse phase XSelect CSH C18 2.5 µm resin (Waters) on  
132 an in-line 150 x 0.075 mm column using an UltiMate 3000 RSLCnano system (Thermo). Peptides  
133 were eluted using a 120 min gradient from 98:2 to 65:35 buffer A:B ratio (Buffer A, 0.1% formic  
134 acid, 0.5% acetonitrile; Buffer B, 0.1% formic acid, 99.9% acetonitrile). Eluted peptides were  
135 ionized by electrospray (2.4 kV) followed by mass spectrometric analysis on an Orbitrap Fusion  
136 Tribrid mass spectrometer (Thermo Fisher Scientific, Waltham, MA). MS data were acquired  
137 using a Fourier transform MS (FTMS) analyzer in profile mode at a resolution of 240,000 over a  
138 range of 375 to 1500 m/z. Following high-energy collisional dissociation (HCD) activation,



162 and induced by 0.3 mM IPTG following standard protocol. The supernatant protein containing the  
163 target protein was quantified using Pierce BCA protein assay kit (ThermoFisher, cat #: 23225).  
164 The incubation volume in each tube (50 ml Falcon tube) was 10 ml lysis buffer (20 mM Tris-HCl  
165 pH8.0, 150 mM NaCl, and 10 mM imidazole) containing about 8µg of crude enzyme and 0.5g  
166 ethanol-sterilized PE powder and incubated at 30°C with shaking (120 rpm) for one week. Five  
167 sample groups with three replicates each were set up: PE powder only, PE powder + uninduced  
168 supernatant, PE powder + induced peg1726 supernatant, PE powder + induced peg6607  
169 supernatant, PE powder + induced peg1726 supernatant + induced peg6607 supernatant. After  
170 incubation, the PE powder was washed with 2% SDS and dried before FTIR assay as described  
171 above.

172

### 173 **Reference:**

- 174 (1) Frank, J. A.; Reich, C. I.; Sharma, S.; Weisbaum, J. S.; Wilson, B. A.; Olsen, G. J. Critical evaluation of two  
175 primers commonly used for amplification of bacterial 16S rRNA genes. *Appl Environ Microbiol* **2008**, *74*  
176 (8), 2461-2470. DOI: 10.1128/aem.02272-07 From NLM.
- 177 (2) Bushnell, B.; Rood, J.; Singer, E. BBMerge – Accurate paired shotgun read merging via overlap. *PLOS*  
178 *ONE* **2017**, *12* (10), e0185056. DOI: 10.1371/journal.pone.0185056.
- 179 (3) Davis, J. J.; Wattam, A. R.; Aziz, R. K.; Brettin, T.; Butler, R.; Butler, R. M.; Chlenski, P.; Conrad, N.;  
180 Dickerman, A.; Dietrich, E. M. The PATRIC Bioinformatics Resource Center: expanding data and analysis  
181 capabilities. *Nucleic Acids Research* **2019**, *48* (D1), D606-D612. DOI: 10.1093/nar/gkz943 (accessed  
182 3/20/2023).
- 183 (4) Wang, D.; Hunt, K. A.; Candry, P.; Tao, X.; Wofford, N. Q.; Zhou, J.; McInerney, M. J.; Stahl, D. A.; Tanner,  
184 R. S.; Zhou, A. Cross-Feedings, Competition, and Positive and Negative Synergies in a Four-Species  
185 Synthetic Community for Anaerobic Degradation of Cellulose to Methane. *Mbio* **2023**, e03189-03122.
- 186 (5) Guo, X.; Li, Z.; Yao, Q.; Mueller, R. S.; Eng, J. K.; Tabb, D. L.; Hervey, W. J., IV; Pan, C. Sipros Ensemble  
187 improves database searching and filtering for complex metaproteomics. *Bioinformatics* **2017**, *34* (5), 795-  
188 802. DOI: 10.1093/bioinformatics/btx601 (accessed 3/20/2023).
- 189 (6) Pan, C.; Kora, G.; McDonald, W. H.; Tabb, D. L.; VerBerkmoes, N. C.; Hurst, G. B.; Pelletier, D. A.;  
190 Samatova, N. F.; Hettich, R. L. ProRata: A Quantitative Proteomics Program for Accurate Protein  
191 Abundance Ratio Estimation with Confidence Interval Evaluation. *Analytical Chemistry* **2006**, *78* (20),  
192 7121-7131. DOI: 10.1021/ac060654b.

193





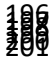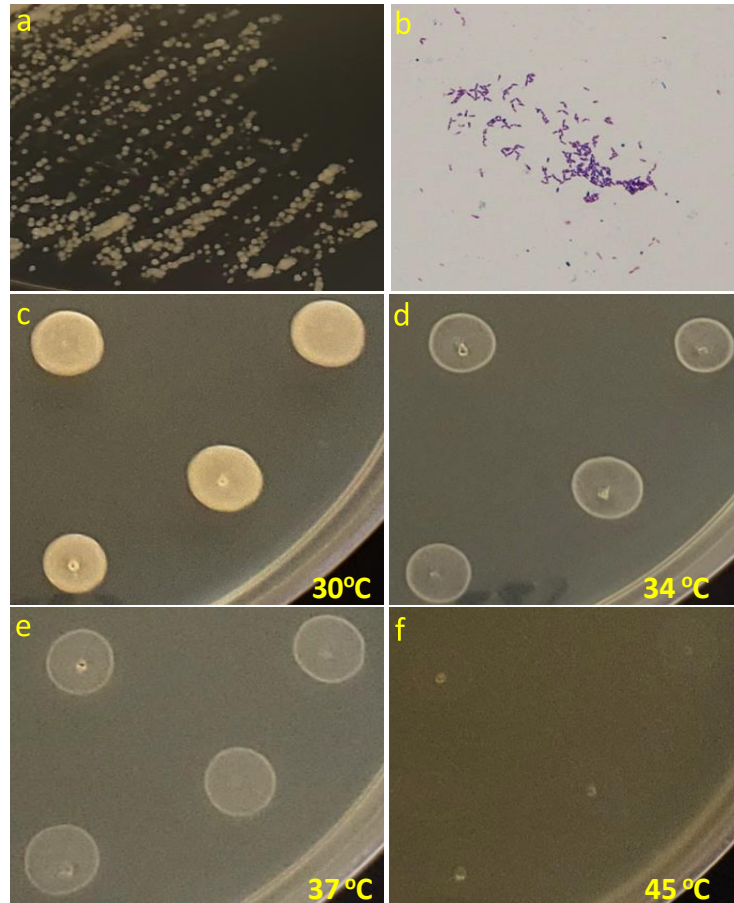

202  
203  
204  
205  
206  
207  
208  
209

**Figure S1.** Morphology, gram staining, and optimal growth temperature of *Rhodococcus* strain A34. a. Morphology of strain A 34 on TSA plate. b. Gram-staining of strain A34. c~f. Optimal growth temperature tested on TSA plates. Best growth was observed at 30°C. As the temperature increased, the growth was inhibited, no growth was observed at 45°C.

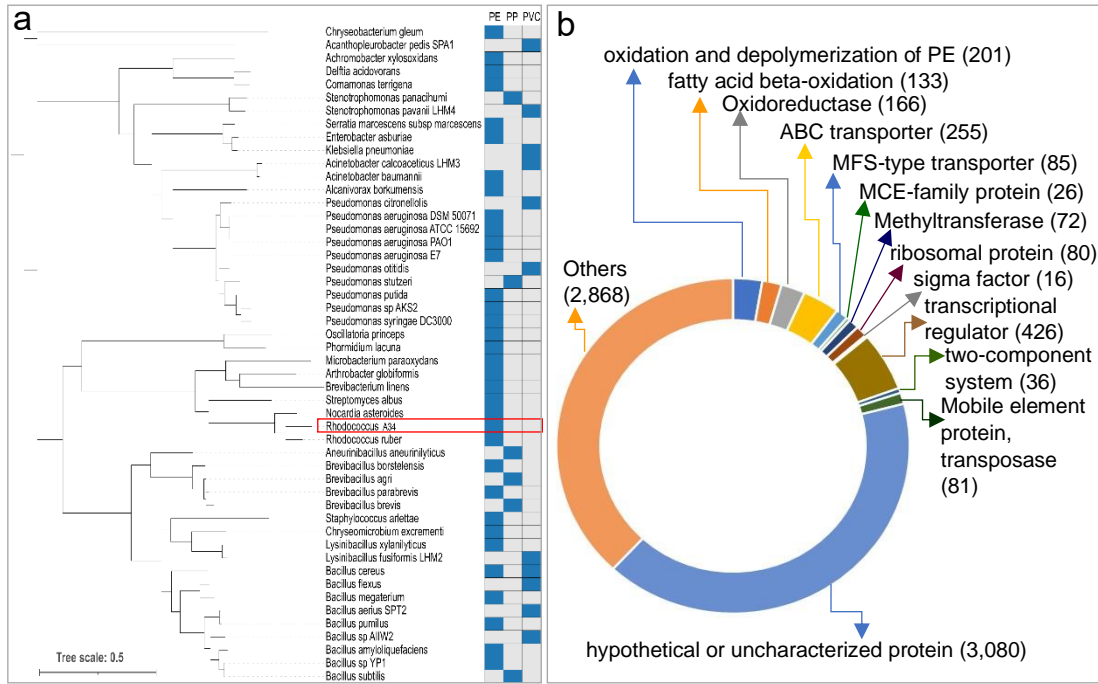

210

211 **Figure S2.** Genome-level phylogeny of strain A34 and genetic potential of A34 genome. a. The  
 212 phylogenetic tree that was built using the reference genomes from GTDBtk. b. Classification of  
 213 genes annotated in A34 genome.

214

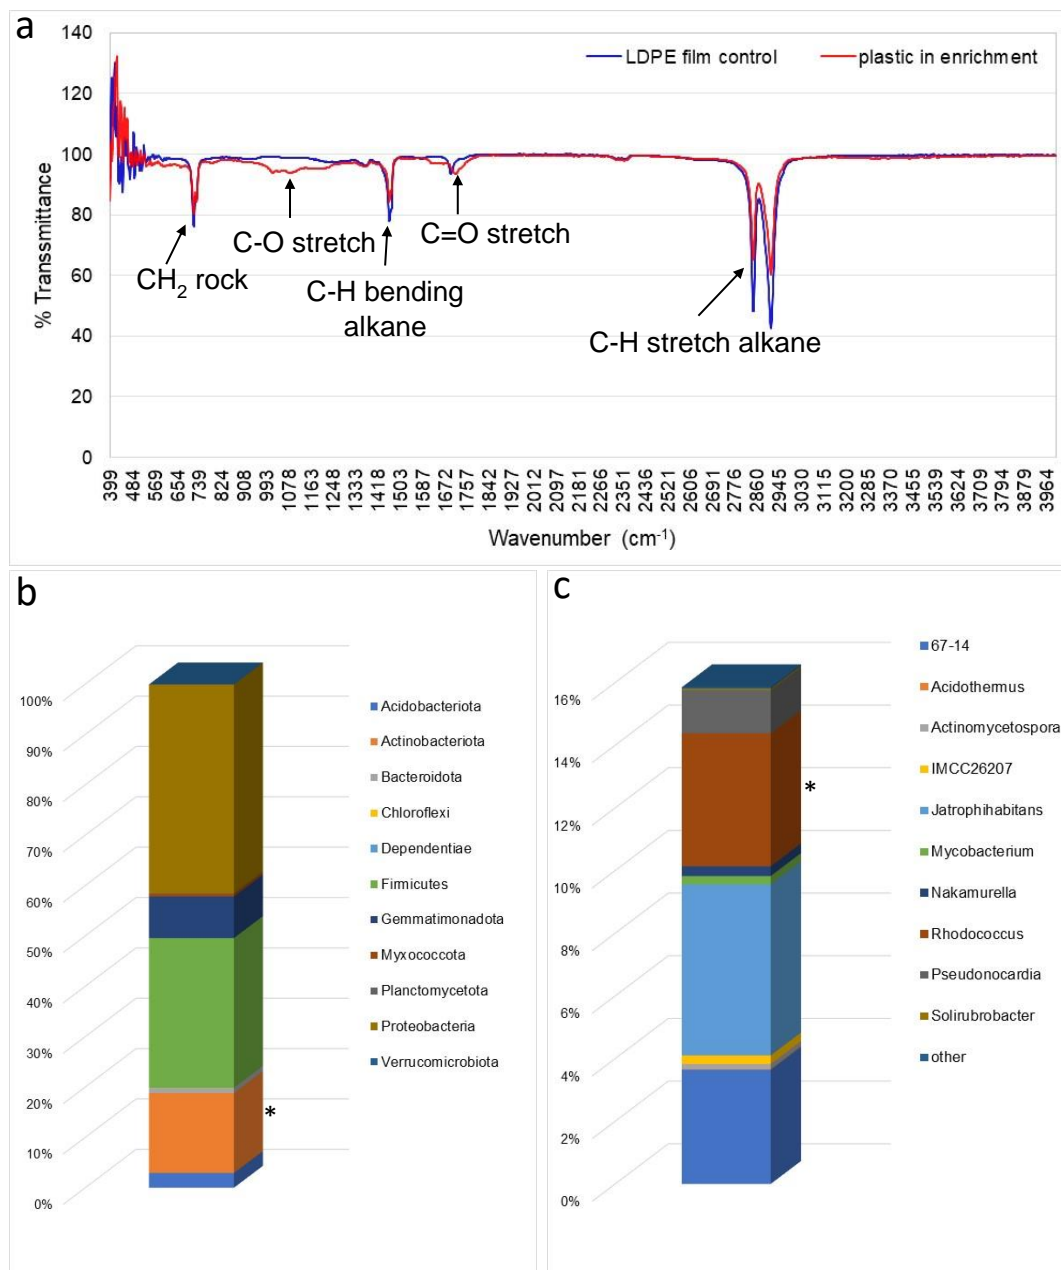

215

216 **Figure S3.** Type of plastic and the microbial community compositions in the enrichment cultures.

217 a. FTIR spectrum of the plastic in enrichment # 5 where *Rhodococcus* strain A34 was isolated

218 from. LDPE film (GoodFellow, product number: 311301) was used as control. b. The bacterial

219 community composition in enrichment #5 at phylum level. c. The genus level composition of

220 Actinobacteriota. \*: the phylum or the genus A34 belong to.

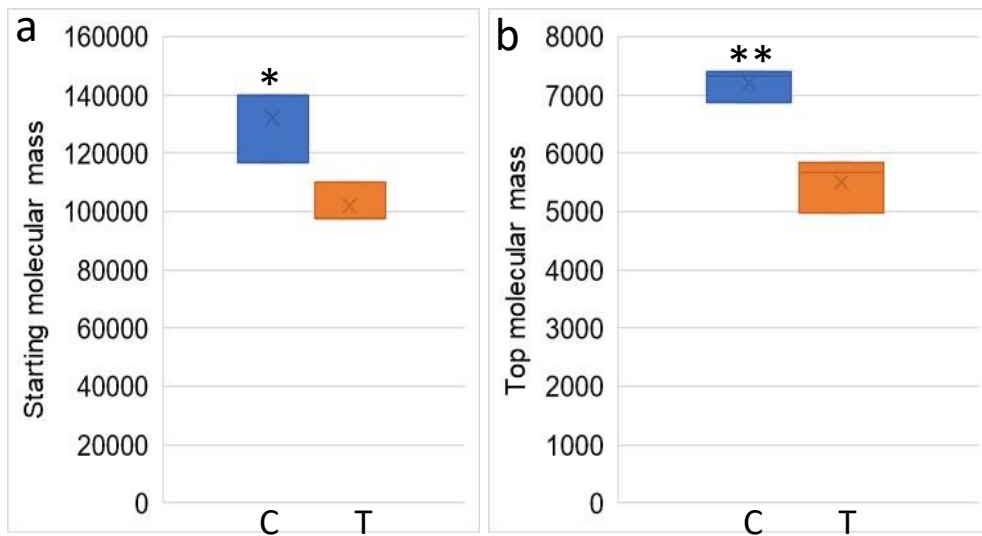

221

222 **Figure S4.** The size distribution of PE powder significantly decreased in samples incubated with  
 223 A34 (T) compared to samples without A34 (C) for 30 days. a. starting molecular mass ( $p = 0.025$ ).

224 b. top molecular mass ( $p = 0.005$ ). Unpaired two-tailed  $t$  test,  $*p < 0.05$ ,  $**p < 0.01$ .

225

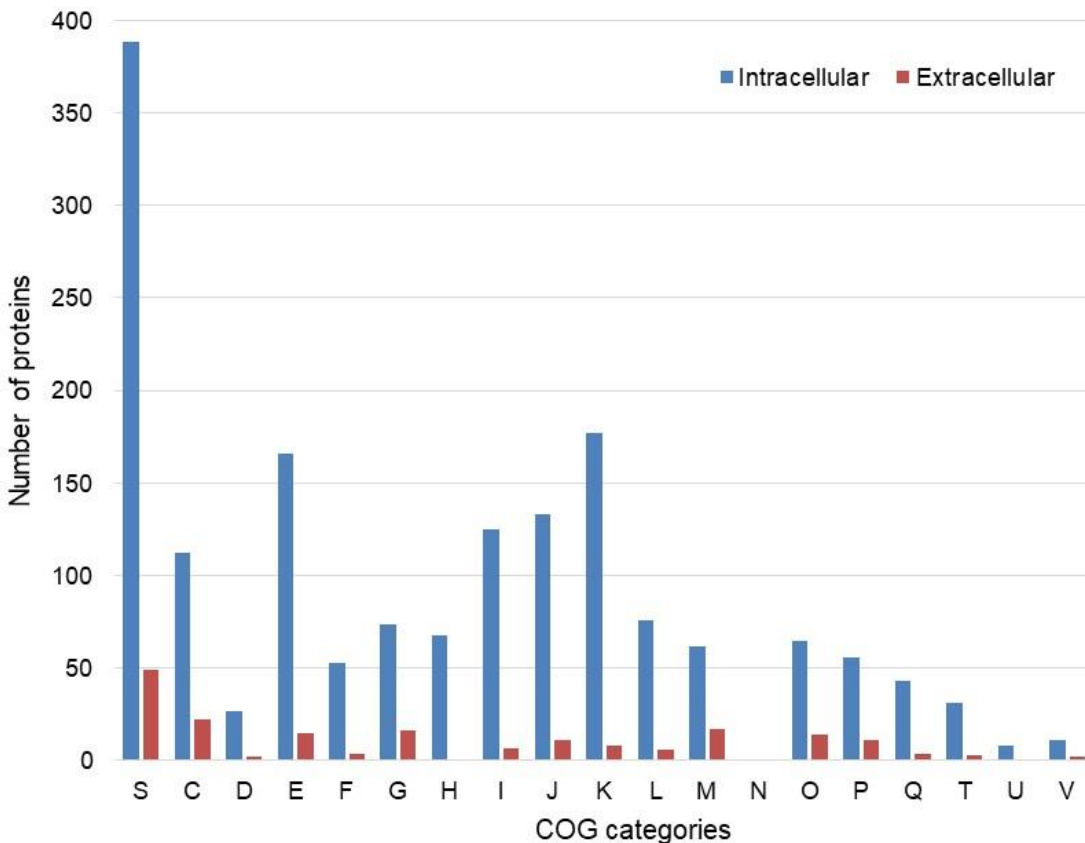

226

227 **Figure S5.** Proteins detected in time zero samples of *Rhocococcus* strain A34 grown in rich  
 228 medium TSB. COG categories were used for classification of protein. Intracellular: proteins  
 229 extracted from cell pellet. Extracellular: proteins extracted from supernatant. S, function unknown;  
 230 C, energy production and conversion; D, cell cycle control, cell division, chromosome partitioning;  
 231 E, amino acid transport and metabolism; F, nucleotide transport and metabolism; G, carbohydrate  
 232 transport and metabolism; H, coenzyme transport and metabolism; I, lipid transport and  
 233 metabolism; J, translation, ribosomal structure and biogenesis; K, transcription; L, replication,  
 234 recombination and repair; M, cell wall/membrane/envelop biogenesis; N, cell motility; O, post-  
 235 translational modification, protein turnover, chaperones; P, inorganic ion transport and metabolism;  
 236 Q, secondary metabolites biosynthesis, transport and metabolism; T, signal transduction; U,  
 237 intracellular trafficking and secretion; V, defense mechanisms.

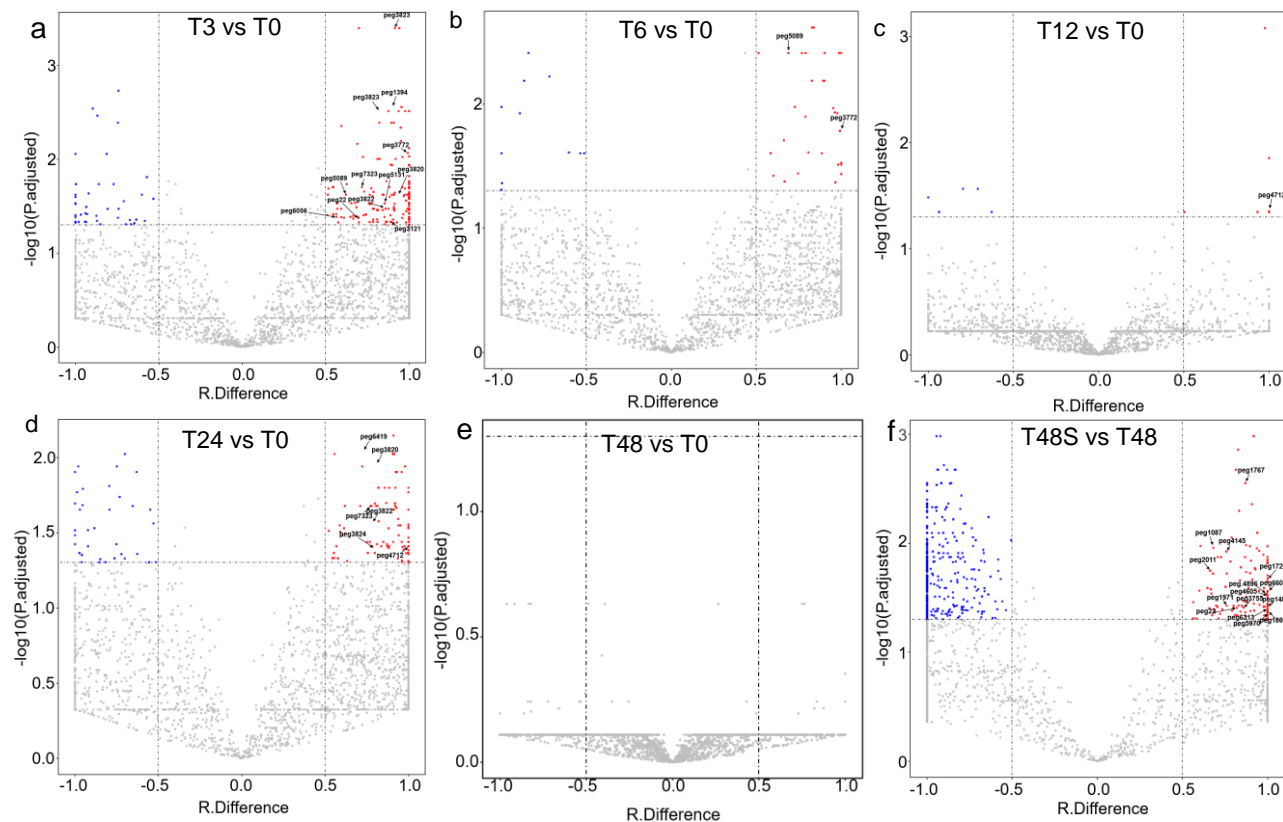

238

239 **Figure S6.** Volcano maps showing proteins with significant abundance changes at each timepoint  
 240 compared to time zero (a to e) or extracellular vs intracellular (f, T48S vs T48). red dots, increased  
 241 abundance; blue dots, decreased abundance. Key enzymes involved in PE oxidation,  
 242 depolymerization and fatty acid beat oxidations were labelled.

243

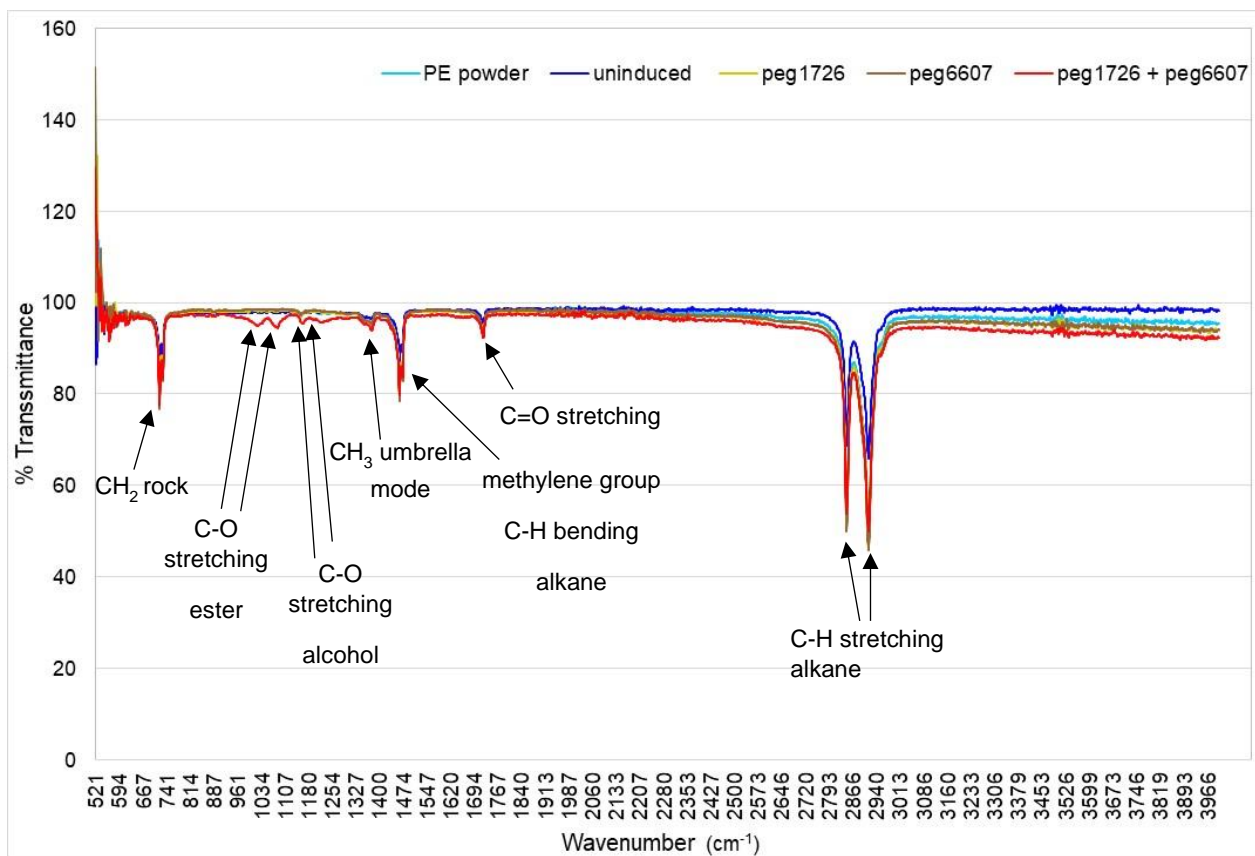

244

245 **Figure S7.** PE functional group changes after incubation with heterologous expressed crude  
 246 enzymes. peg1726, a multicopper oxidase. peg6607, a putative esterase.

247
